# Supplementary material for: Complexity of the Genetics and Clinical Presentation of Spinocerebellar Ataxia 17
Source: Front Cell Neurosci. 2018 Nov 23;12:429. doi: 10.3389/fncel.2018.00429 (PMC6265347; doi:10.3389/fncel.2018.00429)
Supplement: TABLE S4 — Summary of age at disease onset and allele size data for each individual. Data is presented from both fragment sizing and clone sequencing normal and expanded alleles. Age at onset data was available for 21 out of 30 individuals. Patient #8 (highlighted in blue italics) had a genetic diagnosis of ARCA1/SCAR8 (see text), which explains the early age at onset despite the 41 repeat SCA17 allele. This data was used to compile the graphs in Figure 3. [file Table_4.XLSX]

## Sheet: Sheet1
		Repeat Size
		Fragment Sizing		Mean Sequenced
Individual	Age at Onset (yrs)	Normal	Expanded	Normal	Longest CAG Stretch	Expanded
1		38	46	38	25	46
2		38	56	38	45	57
3	41	39	46	39	26	46
4	21	39	51	39	21	51
5	Asymptomatic at 50	37	51	37	21	51
6		37	51	37	31	51
7	36	38	45	38	25	45
8	20	36	41	37	21	41
9	45	38	52	38	18	52
10	45	39	43	37	23	43
11	52	37	41	34	23	41
12	65	38	42	38	23	42
13	36	38	48	38	26	47
14	60	38	41	38	19	41
15	49	37	41	37	22	41
16	39	38	48	37	26	47
17	42	40	42	40	22	42
18	62	37	42	37	22	42
19		36	45	36	25	45
20		37	41	37	22	41
21	68	38	41	37	21	41
22	46	38	42	37	23	42
23	61	41	42	40	23	41
24		39	41	40	21	41
25	14	37	56	37	17	57
26		38	41	38	21	41
27	67	38	43	37	23	43
28	49	40	41	40	19	41
29	42	37	42	37	23	42
30	64	36	41	37	19	41
